# Supplementary material for: Learning, Forgetting, and Sales
Source: Atypon-hosted journal article supplement (doi:10.1287/mnsc.1080.0909), 2008-09-06
Supplement: mnsc.1080.0909-sm-ec.pdf [file mnsc.1080.0909-sm-ec.pdf]

**e - c o m p a n i o n**

ONLY AVAILABLE IN ELECTRONIC FORM

Electronic Companion—“Learning, Forgetting, and Sales” by Sofia Berto  
Villas-Boas and J. Miguel Villas-Boas, *Management Science*,  
DOI 10.1287/mnsc.1080.0909.

---

## TECHNICAL APPENDIX

FOR "LEARNING, FORGETTING, AND SALES," BY SOFIA B. VILLAS-BOAS AND J. MIGUEL

VILLAS-BOAS

PROOF OF PROPOSITION 1: Using (1) and (3) in (2) one obtains

$$\beta^T + \frac{\delta(1-\beta)}{1-(1-\alpha)\delta^T\beta^T} - \frac{(1-\delta)(\delta\beta - \delta^T\beta^T)}{(1-\delta^T)(1-\delta\beta)} = \frac{1-(1-\alpha)\beta^T}{1-(1-\alpha)\delta^T\beta^T} \left[1 - \delta\beta + \delta^T \frac{1-\delta}{1-\delta^T}\right]. \quad (i)$$

Making  $\delta \rightarrow 1$ , using  $\lim_{\delta \rightarrow 1} \frac{1-\delta}{1-\delta^T} = \frac{1}{T}$ , one then obtains

$$T(1-\beta)\beta^T[1+(1-\alpha)(1-\beta-\beta^T)] - (1-\beta^T)(1-(1-\alpha)\beta^T) = 0. \quad (ii)$$

Noting that the left hand side is decreasing in  $T$  and  $\alpha$ , and increasing in  $\beta$  for  $\beta$  large, one obtains that  $T$  is increasing in  $\beta$  and decreasing in  $\alpha$ . Finally, the equivalent to (ii) with  $\delta \neq 1$ , is increasing in  $\delta$  for  $\delta$  close to one, obtaining that  $T$  is increasing in  $\delta$ . The comparative statics for  $p$  can be similarly obtained using (1) and (ii).

PROOF OF PROPOSITION 2: Because the derivative of  $V(x_h)$  with respect to  $k$  is increasing in  $T$ , and as for  $k \rightarrow 0$  we have that  $T \rightarrow 0$  as shown below, we have that  $T$  is increasing in  $k$ . Differentiating  $V(x_h)$  with respect to  $T$ , multiplying by  $(1 - e^{-rT})$ , and equalizing to zero, one obtains:

$$\begin{aligned} & -re^{-rT}V(x_h) + \alpha u x_h z e^{-(1+r-\beta)zT} + \alpha u \left[1 - \frac{\lambda(1-\alpha)}{1+\lambda-\beta}\right] (e^{-rT} - ze^{-rzT}) \\ & - \alpha(1-\alpha)u(x_h e^{-(1-\beta)zT} - \frac{\lambda}{1+\lambda-\beta}) (e^{-(1+r+\lambda-\beta)T} - ze^{-(1+r+\lambda-\beta)zT}) + \frac{rk}{2} (ze^{-rzT} - e^{-rT}) = 0. \quad (iii) \end{aligned}$$

From this one can obtain that when  $k \rightarrow 0$  we have  $T \rightarrow 0$ . One can then obtain,

$$\lim_{k \rightarrow 0} V(x_h) = \alpha u x_h z + \alpha u (1-z) \left[1 - \frac{\lambda(1-\alpha)}{1+\lambda-\beta}\right] - (1-\alpha)\alpha u \left(x_h - \frac{\lambda}{1+\lambda-\beta}\right) (1-z) \quad (iv)$$

and  $\lim_{k \rightarrow 0} x_h = \frac{\lambda(1-z)}{1+\lambda(1-z)-\beta}$ . In order to find the optimal  $z$  for  $k$  close to zero, one can maximize

(iv) to obtain

$$z = \frac{1}{\lambda} \left( 2 - \beta - \sqrt{(1 - \beta)^2 + \frac{(1 - \beta)(1 + \lambda - \beta)}{1 - \alpha}} \right). \quad (\text{v})$$

Differentiating (v) with respect to  $\beta$ ,  $\alpha$ , and  $\lambda$  one obtains that  $\frac{dz}{d\beta} > 0$ ,  $\frac{dz}{d\alpha} < 0$ , and  $\frac{dz}{d\lambda} < 0$ .

In order to consider the comparative statics with respect to  $T$  for  $k$  small, multiply (iii) by  $(1 - e^{-rT})$  and divide by  $T^2$  to obtain

$$\begin{aligned} \lim_{k \rightarrow 0} \frac{2k}{z(1-z)\alpha u T^2} &= \lambda \frac{z(1+r-\beta) - r}{1 + \lambda(1-z) - \beta} + r \left[ 1 - \frac{\lambda(1-\alpha)}{1 + \lambda - \beta} \right] \\ &\quad + [(1+r+\lambda-\beta)(1+z) - r] \frac{\lambda(1-\alpha)(1-\beta)}{(1 + \lambda - \beta)[1 + \lambda(1-z) - \beta]}. \end{aligned} \quad (\text{vi})$$

Differentiating (vi) for  $z$  in (v) close to one we can obtain  $\frac{dT}{d\beta} > 0$ ,  $\frac{dT}{d\alpha} < 0$ ,  $\frac{dT}{d\lambda} < 0$ ,  $\frac{dT}{du} < 0$ , and  $\frac{dT}{dr} < 0$ .

**PROOF OF PROPOSITION 3:** Differentiating the duration of the sale  $(1-z)T$  with respect to a variable  $y$  one obtains  $\frac{d(1-z)T}{dy} = -T \frac{dz}{dy} + (1-z) \frac{dT}{dy}$ . For  $k$  close to zero, we can obtain from (vi)  $\frac{dT}{dy} = \frac{T}{2(1-z)} \frac{dz}{dy} - \frac{T^3(1-z)}{4k} \frac{d}{dy} \left( \frac{2k}{T^2(1-z)} \right)$ . This then yields that for  $k$  close to zero, and the optimal  $z$  close to one, the sign of  $\frac{d(1-z)T}{dy}$  is the same as the sign of  $-\frac{dz}{dy}$  for  $y \in \{\beta, \lambda, \alpha\}$ , and the same as the sign of  $\frac{dT}{dy}$  for  $y \in \{u, r\}$  (given the assumption of  $k$  converging to zero faster than  $z$  converging to one).
